# Supplementary material
Source: PubMed Central journal article supplement (PMC8786084)

## Supplementary Material

**Supplemental Table 1** – International classification of disease codes used for determining past medical history

**Supplemental Table 2** – Illness Severity Concordance

**Supplemental Table 3** – Missing Data

**Supplemental Table 4** – Sensitivity analysis of the Logistic regression analysis of characteristics and outcomes associated with developing hypermagnesemia excluding patients with hypomagnesemia

**Supplemental Table 5** – Sensitivity analysis of the survival analysis showing hazard ratios for death excluding patients with hypomagnesemia

**Supplemental Figure 1 - Patient survival curves by median magnesium tertiles**

Kaplan Meier curve for patient survival over time from admission for all patients stratified by tertiles of median magnesium (lowest values = Tertile 1 (blue) while highest values = Tertile 3 (green);  $p < 0.001$ ).

**Supplemental Table 1 – International classification of disease codes used for determining past medical history**

| DM                              | DM (continued)                | HTN                        | CKD                           | Pulmonary Disease | Liver Disease               |
|---------------------------------|-------------------------------|----------------------------|-------------------------------|-------------------|-----------------------------|
| E10.10                          | E08.65                        | I10                        | N18.9                         | J45.909           | B15.9                       |
| E10.21                          | E11.3513                      | I27.20                     | E11.22, I12.9, N18.4          | J45.40            | B16.1                       |
| E10.22                          | E11.69, N52.1                 | I12.9                      | N18.4                         | J44.1, J45.901    | B16.9                       |
| E10.29                          | E11.22, N18.4, E11.65         | I11.9                      | N18.3                         | J45.998           | B17.0                       |
| E10.3553                        | E13.628, Z79.4                | E11.22, I12.9, N18.4       | N18.30                        | J45.20            | B17.10                      |
| E10.36                          | E11.621, I97.502              | O13.9                      | N18.6, Z99.2                  | J44.9             | B17.8                       |
| E10.36, E10.65                  | E13.69, M86.9                 | G93.2                      | N18.5                         | J45.21            | B17.9                       |
| E10.39                          | N25.1                         | I12.9, N18.3               | N18.4, D63.1                  | J45.901           | B18.0                       |
| E10.43, E10.65, K31.84          | E10.319, E10.65               | I12.9, N18.30              | I12.9, N18.3                  | J45.30            | B18.1                       |
| E10.51                          | E11.36                        | Z86.79                     | I12.9, N18.30                 | J45.991           | B18.1, K74.60               |
| E10.51, E10.65                  | E13.3313                      | I12.9, N18.4               | E13.22, N18.3, E13.65         | Z82.5             | B18.2                       |
| E10.641                         | E10.3399, E10.65              | I87.312, I97.929           | N18.9, E83.9, M89.9           | J45.909, Z79.52   | B18.2, K74.60               |
| E10.65                          | E11.621, I97.511              | I11.0                      | I12.9, N18.4                  | J45.990           | B18.9                       |
| E10.8                           | E09.65                        | E11.22, I12.0, N18.5       | E13.22, N18.4, E13.65         | R09.02, J45.909   | B19.10                      |
| E10.9                           | E08.319, H54.7                | I27.21                     | E11.22, I12.0, N18.5          | O99.519, J45.909  | B19.11                      |
| E11.00                          | E11.3521                      | O16.3                      | N18.9, D63.1                  | J45.42            | B19.20                      |
| E11.00, Z79.4                   | E13.21                        | I16.1                      | E08.22                        | Z87.09            | B19.20, G63                 |
| E11.10                          | E08.21                        | K76.6, I85.00              | I12.9                         | J45.901, J44.9    | B19.20, K74.69              |
| E11.10, Z79.4                   | E10.22, E10.65, N18.6, Z99.2  | K76.6                      | N18.5, D63.1                  | J45.41            | B19.21                      |
| E11.11, Z79.4                   | E11.621, I97.425              | I87.333, I97.919, I97.929  | E11.22, I12.9                 | J45.50            | B19.9                       |
| E11.21                          | E11.621, I97.509, Z79.4       | I27.29, I26.99             | N18.9, Z86.2                  | I50.1             | B20, B19.10                 |
| E11.21, E11.65, Z79.4           | O24.013                       | I11.0, I50.30              | E11.22, Z79.4                 | J45.909, Z91.89   | D89.1, B18.2                |
| E11.22                          | E11.618, M75.02               | O10.019                    | N18.2                         | J45.31            | E80.6, K76.89, K83.1        |
| E11.22, I12.0, N18.5            | E13.319, H35.049              | O10.919                    | E11.22, N18.2                 | J45.902           | E80.6, K76.89, K83.8        |
| E11.22, N18.2                   | E11.618, M75.01               | K76.6, K31.89              | E11.22, N18.5                 | J45.52            | E83.01                      |
| E11.22, N18.2, Z79.4            | E11.618                       | E11.22, I12.9              | N17.9, N18.9, Z99.2           | O99.512, J45.909  | E83.10                      |
| E11.22, N18.3                   | E11.69, E88.9                 | E11.59, I10                | E11.22, N18.3                 | J45.51            | E83.110                     |
| E11.22, N18.3, Z79.4            | O24.911                       | O16.9                      | E11.22, I12.9, N18.3          | J45.32            | E83.111                     |
| E11.22, N18.4                   | E11.65, E11.39, H42           | Z87.59                     | N18.6                         | J45.22            | E83.118                     |
| E11.22, N18.5                   | Z91.19                        | I16.9                      | N18.3, D63.1                  | O99.513, J45.909  | E83.119                     |
| E11.22, N18.5, Z79.4            | E11.3522                      | R03.0                      | N17.9, N18.9                  | J44.1             | E83.19                      |
| E11.22, N18.6                   | E11.621, I97.515              | I15.9                      | E11.22, N18.6, Z99.2, Z79.4   | 493               | E84.8, K74.60               |
| E11.22, N18.6, E11.65           | E08.621, I97.524              | I27.22                     | E11.22                        | 493.9             | E88.01                      |
| E11.22, N18.6, Z79.4, Z99.2     | E10.29, R80.9                 | I87.339, I97.909           | N18.6, D63.1, Z99.2           | 493.92            | E88.1                       |
| E11.22, N18.6, Z99.2            | E13.22, N18.2, E13.65         | H35.033                    | I12.9, N18.2                  | 493.02            | G40.B19                     |
| E11.22, N18.6, Z99.2, Z79.4     | E08.65, E08.22, N18.30, Z79.4 | I16.0                      | N18.1                         | V12.69            | J43.8, E88.01               |
| E11.22, Z79.4                   | E08.319                       | E11.22, I12.9, N18.3       | N17.9, N18.3                  | 648.9             | K70.0                       |
| E11.29                          | E10.22, N18.4, E10.65         | I27.0                      | N17.9, N18.30                 | 493.9             | K70.10                      |
| E11.29, E11.65                  | E08.621, I97.519              | IM00002                    | I12.0, N18.6, Z99.2           | 493.91            | K70.11                      |
| E11.29, R80.9                   | E11.22, I12.0, Z99.2, N18.6   | O11.9                      | Z01.818                       | 466               | K70.30                      |
| E11.29, Z79.4                   | E11.22, N18.1, E11.65         | O10.219                    | E11.22, N18.3, Z79.4          | 493.12            | K70.30, I85.10              |
| E11.311                         | E11.69, E78.2                 | O14.15                     | E11.22, N18.4, Z79.4          | 493.22            | K70.31                      |
| E11.311, E11.65                 | E11.01                        | I27.22, I05.9              | I12.0, N18.5                  | 493.82            | K70.40                      |
| E11.319                         | E11.3412, E11.65, Z79.4       | T86.49, K76.6              | N18.30, D63.1                 | 493.2             | K70.9                       |
| E11.3299                        | E11.622, I97.929              | I27.24                     | E11.22, N18.2, Z79.4          | V17.5             | K72.90, K74.60              |
| E11.3312                        | E11.621, I97.423              | Z86.79, Z87.59             | N17.9, N18.4                  | 493.1             | K74.0                       |
| E11.3313                        | E11.42, Z79.4                 | I15.1, N28.89              | I13.0, N18.1                  | 493.2             | K74.00                      |
| E11.3391                        | E11.621, I97.522              | I12.9, N18.2               | E10.22, N18.5                 | Z78.9             | K74.1                       |
| E11.3393, Z79.4                 | E13.10                        | I15.8, T50.905A            | N17.9, N18.5                  | J68.3             | K74.2                       |
| E11.3499                        | E11.622, E11.65, I97.909      | O13.3                      | E11.22, N18.30                | J20.9             | K74.3                       |
| E11.3513, H54.2X22              | E11.3293, Z79.4               | I27.29                     | N18.31                        | 493.11            | K74.3, K83.01               |
| E11.3513, Z79.4                 | K86.89, E08.65                | I15.2, E27.9               | E11.22, N18.4                 | O99.519           | K74.4                       |
| E11.3592, Z79.4                 | E10.649                       | H35.031                    | E10.22                        | O99.513           | K74.5                       |
| E11.3593                        | E11.22, I12.9, N18.2          | O14.14                     | I13.0, I50.21                 | J44.9             | K74.60                      |
| E11.3593, Z79.4                 | E11.621, I97.521              | I12.0, N18.6, Z99.2        | E13.22, I12.9, N18.2          | J43.9             | K74.60, B19.10              |
| E11.3599                        | O24.319                       | H35.039                    | N17.9, N18.2                  | J44.9, Z91.89     | K74.60, I85.10              |
| E11.39                          | E13.29, E13.65                | I27.29, D86.9              | I13.10, N18.2                 | J44.1             | K74.60, K76.9               |
| E11.39, E11.65                  | E11.621, I97.512              | R09.89                     | E11.22, I12.9, N18.30         | J44.1, J45.901    | K74.60, R18.8               |
| E11.39, H43.11                  | E08.8                         | I15.8                      | E10.22, N18.6, Z99.2          | I27.23, J44.9     | K74.69                      |
| E11.39, Z79.4                   | O24.019                       | H40.059                    | E11.22, N18.30, Z79.4         | G47.33, J44.9     | K74.69, B19.20              |
| E11.40                          | E11.622, I97.309              | I12.0, N18.5               | I13.11, N18.6, Z99.2          | J44.0             | K74.69, J94.8               |
| E11.40, M54.12                  | E13.01                        | I15.0                      | I13.10                        | J44.9, R06.03     | K75.4                       |
| E11.40, Z79.4                   | E08.42                        | I87.393                    | I13.0                         | Z87.09            | K75.81, K74.60              |
| E11.41, G57.90                  | O24.113                       | I87.332, I97.929           | E13.22, I12.9, N18.3          | J44.9, J96.00     | K76.0                       |
| E11.42                          | E11.41, Z79.4                 | I12.0, N18.6               | I13.0, I50.40                 | J44.9, R64        | K76.1                       |
| E11.43, E11.65                  | E11.3551, Z79.4               | I27.23, J44.9              | E11.22, N18.4, E11.65         | J44.0, J20.9      | K76.5                       |
| E11.43, K31.84                  | E08.29, R80.9, Z79.4          | I13.0, N18.1               | I10, N28.9                    | J96.00            | K76.6                       |
| E11.49                          | E10.69                        | O16.5                      | E11.22, N18.5, Z79.4          | 496               | K76.6, I85.00               |
| E11.49, E11.65                  | E09.9                         | I11.9, I43                 | I13.0, I50.33                 | 491.21            | K76.6, K31.89               |
| E11.49, Z79.4                   | E10.40                        | H40.052                    | E10.22, E10.65, N18.6, Z99.2  | 491.22            | K76.7                       |
| E11.51                          | E11.51, I70.209               | I15.8, Z94.9               | I13.0, I50.30                 | G47.33            | K76.81                      |
| E11.51, E11.65                  | E13.65                        | H40.053                    | I12.9, N18.1                  | V49.89            | K76.89                      |
| E11.59                          | E10.22, N18.2                 | I10, R80.9                 | I13.10, N18.4                 | 492.8             | K76.9                       |
| E11.59, I10                     | M33.90                        | I13.0, I50.21              | I13.2                         | 493.9             | K76.9, G99.0                |
| E11.59, Z79.4                   | E08.29, R80.9                 | E13.22, I12.9, N18.2       | E13.22, N18.2, E13.65         | 493.22            | K76.9, J91.8                |
| E11.621                         | E11.00, E11.65                | I97.3                      | E08.65, E08.22, N18.30, Z79.4 | J43.8             | K83.01                      |
| E11.621, E11.69, I97.509, M86.9 | E11.39, H43.10                | I13.10, N18.2              | E10.22, N18.4, E10.65         | I27.23            | K83.1                       |
| E11.621, I97.409                | E10.43, K31.84                | I15.1, E26.09              | E11.22, N18.1, E11.65         | Z78.9             | K83.1, C80.1                |
| E11.621, I97.411                | Z71.89                        | I15.2, E26.09              | N18.2, D63.1                  | J84.10            | K85.90, K83.1               |
| E11.621, I97.424                | E08.621, I97.423              | E11.22, I12.9, N18.30      | Z87.448                       | J84.112           | K91.89, K83.1               |
| E11.621, I97.509                | E11.621, I97.413              | I27.22, I38                | E11.22, I12.9, N18.2          | Z87.09            | O26.612, K83.1              |
| E11.621, I97.509, E11.52        | E08.621, I97.419              | I27.23, J84.9              | I13.10, N18.3                 | 515               | O26.613, K83.1              |
| E11.621, I97.519                | E08.621, I97.422              | O14.94                     | I13.0, I50.32                 | 516.31            | O26.619, K76.0              |
| E11.621, I97.526                | E11.3492                      | I13.11, N18.6, Z99.2       | E11.22, N18.6, Z99.2          | E70.331           | O26.619, K83.1              |
| E11.621, I97.529                | E11.621, I97.426              | I13.10                     | I12.0                         |                   | O98.412, B18.1              |
| E11.622, I97.909                | E13.29                        | I87.319, I97.909           | E11.22, N18.6, Z79.4, Z99.2   |                   | O98.419, B17.10             |
| E11.622, I98.499                | E08.621, I97.515              | E11.69, I10, E66.9, E11.59 | N17.0, N18.9                  |                   | O98.419, B19.10             |
| E11.628, I03.119                | E11.3219                      | E13.22, I12.9, N18.3       | N17.0, N18.3                  |                   | Q87.89, Q68.8, N28.9, K83.1 |
| E11.628, I08.9                  | O09.291, Z86.32               | I27.29, N18.6, Z99.2       | E10.22, N18.2                 |                   | T86.43, K75.4               |
| E11.649                         | E11.52                        | I13.0, I50.40              | N18.32                        |                   | T86.49, K74.0               |
| E11.649, Z79.4                  | E11.3591, Z79.4               | I67.4                      | N17.9                         |                   | T86.49, K76.6               |
| E11.65                          | P70.0                         | I87.309                    | D63.1                         |                   | T86.49, K83.1               |
| E11.65, Z79.4                   | E10.621, I97.509              | I15.2                      | S85.3                         |                   | Z00.5, B19.10               |

|                            |                             |                             |               |  |  |
|----------------------------|-----------------------------|-----------------------------|---------------|--|--|
| E11.69                     | E10.628, L08.9              | I10, N28.9                  | 585.9         |  |  |
| E11.69, E66.9              | E08.52, Z79.4               | O10.013                     | 585.5         |  |  |
| E11.69, E78.5              | E08.621, L97.521            | I87.321                     | 285.21        |  |  |
| E11.69, I10, E66.9, E11.59 | 250                         | IM00001                     | 585.4         |  |  |
| E11.8                      | O24.011                     | I87.303                     | 403.11        |  |  |
| E11.8, E11.65              | 250.02                      | I13.0, I50.33               | 584.9         |  |  |
| E11.8, E11.65, Z79.4       | 250.62                      | I13.0, I50.30               | 585.1         |  |  |
| E11.8, Z79.4               | 250.01                      | I87.399                     | N17.0         |  |  |
| E11.9                      | V77.1                       | I12.9, N18.1                | 585.2         |  |  |
| E11.9, Z79.4               | 250.42                      | I13.10, N18.4               | E09.22        |  |  |
| E11.9, Z91.89              | E10.621                     | I11.0, I50.20               | E13.22        |  |  |
| IM00001                    | 250.92                      | I13.2                       | E13.21        |  |  |
| E11.22, I12.9, N18.4       | 249.61                      | H40.051                     | N17.1         |  |  |
| O24.419                    | 250.4                       | I27.29, I77.6               | I13.11        |  |  |
| E13.40                     | 250.6                       | E11.22, I12.0, Z99.2, N18.6 | 403.1         |  |  |
| Z86.39                     | 249                         | O13.4                       | N03.9         |  |  |
| Z83.3                      | 249.01                      | I87.313, L97.919, L97.929   | I10           |  |  |
| O24.410                    | E84.9                       | E11.22, I12.9, N18.2        | 585           |  |  |
| E13.22, N18.3, E13.65      | 648.03                      | I13.10, N18.3               | V13.09        |  |  |
| E13.9                      | E11.622                     | I13.0, I50.32               | Z86.2         |  |  |
| E13.22, N18.4, E13.65      | E11.3551                    | I87.331, L97.919            | 250.4         |  |  |
| E08.22                     | 250.9                       | O13.5                       | 250.42        |  |  |
| E84.9, E08.9               | E08.321                     | I12.0                       | N28.9         |  |  |
| E23.2                      | 250.7                       | I11.0, I50.22               | E08.65        |  |  |
| E11.22, I12.9              | E08.3213                    | I27.23                      | N17.8         |  |  |
| O24.415                    | 250.82                      | I27.21, D58.9               | 403.01        |  |  |
| E08.41                     | E10.618                     | O10.011                     | N15.9         |  |  |
| E08.29                     | E08.43                      | Z86.69                      | N99.0         |  |  |
| E09.9, T38.0X5A            | E13.42                      | Z13.6                       | E08.22, Z79.4 |  |  |
| E11.610                    | E08.621                     | I13.0                       |               |  |  |
| E10.610                    | O24.111                     | I11.0, I43                  |               |  |  |
| E13.621, L97.509           | 648                         | I15.1                       |               |  |  |
| E11.22, I12.9, N18.3       | O24.12                      | O99.413, I27.0              |               |  |  |
| R73.03                     | O24.112                     | I87.311, L97.919            |               |  |  |
| E10.42                     | O24.313                     | O10.912                     |               |  |  |
| E11.42, E11.65             | E16.2                       | Z91.89                      |               |  |  |
| E08.40                     | 357.2                       | O16.1                       |               |  |  |
| E11.69, B35.1              | 250.8                       | O13.2                       |               |  |  |
| O24.414                    | E10.319                     | I27.29, Q24.9               |               |  |  |
| E11.52, Z79.4              | 250.61                      | 401.1                       |               |  |  |
| E11.39, H42                | 250.00                      | 401.9                       |               |  |  |
| O09.299, Z86.32            | 250.03                      | 572.3                       |               |  |  |
| Z86.32                     | 250.91                      | O14.90                      |               |  |  |
| E11.3213, Z79.4            | 250.53                      | Z82.49                      |               |  |  |
| E11.21, Z79.4              | 250.5                       | V17.49                      |               |  |  |
| E11.40, G56.20             | 250.41                      | O10.012                     |               |  |  |
| R73.09                     | 250.83                      | 416                         |               |  |  |
| Z13.1                      | E13.22                      | 642.9                       |               |  |  |
| E13.319                    | E09.22                      | I87.332                     |               |  |  |
| O24.419, O09.40            | 250.2                       | I27.2                       |               |  |  |
| O24.119                    | 250.81                      | 401                         |               |  |  |
| O24.919                    | E13.649                     | E11.22                      |               |  |  |
| E11.51, Z79.4              | E13.8                       | O16.2                       |               |  |  |
| M33.00                     | E08.39                      | I9-REG7.3                   |               |  |  |
| E11.37X3, Z79.4            | V18.0                       | 403.11                      |               |  |  |
| E10.59                     | E10.3599                    | 401                         |               |  |  |
| E23.0                      | E11.3592                    | 997.91                      |               |  |  |
| P70.1                      | E08.3511                    | 402.9                       |               |  |  |
| E11.3533                   | E10.359                     | 796.2                       |               |  |  |
| E11.3293                   | E11.359                     | 250                         |               |  |  |
| E11.3319                   | 250.1                       | E10.22                      |               |  |  |
| E11.3213                   | Z84.89                      | E11.59                      |               |  |  |
| E08.9, Z79.4               | 253.5                       | 642.13                      |               |  |  |
| E11.22, N18.4, Z79.4       | E08.00                      | O10.913                     |               |  |  |
| E11.43                     | O09.299                     | 642.1                       |               |  |  |
| E11.621, L97.422           | 250.12                      | O10.911                     |               |  |  |
| E08.9                      | 250.52                      | E11.9                       |               |  |  |
| E10.43                     | 250.22                      | 365.04                      |               |  |  |
| E10.22, N18.5              | 633.01                      | 416.8                       |               |  |  |
| E10.3591                   | E08.49                      | 405.19                      |               |  |  |
| E11.3292                   | 249.6                       | K31.89                      |               |  |  |
| Z91.89                     | 249.7                       | I87.319                     |               |  |  |
| E11.69, K86.9              | O24.311                     | I87.313                     |               |  |  |
| E08.621, L97.502           | 588.1                       | 403.9                       |               |  |  |
| E08.621, L97.402           | E09.49                      | I13.11                      |               |  |  |
| E08.44, Z79.4              | E89.1                       | 642.3                       |               |  |  |
| E08.10                     | E13.610                     | 416                         |               |  |  |
| E11.3393                   | 648.8                       | 402.91                      |               |  |  |
| E11.22, N18.30             | 249.8                       | V12.59                      |               |  |  |
| E08.621, L97.529           | E11.341                     | 403.1                       |               |  |  |
| E13.22, I12.9, N18.2       | 250.21                      | 405.11                      |               |  |  |
| E11.29, R80.9, Z79.4       | E13.59                      | 405.99                      |               |  |  |
| E08.40, E08.65             | 250.72                      | 642.33                      |               |  |  |
| E13.51                     | 250.13                      | 642.01                      |               |  |  |
| E11.3413                   | O24.912                     | E13.22                      |               |  |  |
| E11.41                     | O24.012                     | O10.93                      |               |  |  |
| E13.69                     | 249.51                      | 642.03                      |               |  |  |
| E11.59, I20.9              | 249.2                       | I87.329                     |               |  |  |
| E11.22, I12.9, N18.30      | 648.83                      | 402.1                       |               |  |  |
| E11.21, E11.65             | E10.49                      | 38341003                    |               |  |  |
| E10.3299                   | V12.29                      | 642                         |               |  |  |
| E10.22, N18.6              | E09.311                     | 459.3                       |               |  |  |
| E10.22, N18.6, Z99.2       | 250.73                      | O14.10                      |               |  |  |
| E11.22, N18.30, Z79.4      | V23.49                      | V81.1                       |               |  |  |
| E08.21, Z79.4              | 633                         | I87.312                     |               |  |  |
| E13.43                     | Z76.89                      | B20                         |               |  |  |
| E11.621, L97.525           | 249.4                       | 403.01                      |               |  |  |
| O24.439                    | E11.638                     | O99.413                     |               |  |  |
| E11.618, Z79.4             | E10.22, I12.0, Z99.2, N18.6 | Z78.9                       |               |  |  |
| E11.3553                   | E10.8, E10.65               | I87.331                     |               |  |  |
| E11.319, Z79.4             | O24.419, Z79.4              | R00.0                       |               |  |  |
| E08.3593                   | E10.69, E10.65              |                             |               |  |  |
| E10.3213                   | Z94.7                       |                             |               |  |  |
| E13.22, I12.9, N18.3       |                             |                             |               |  |  |
| E11.628                    |                             |                             |               |  |  |
| E11.3511, Z79.4            |                             |                             |               |  |  |
| E11.621, L97.429           |                             |                             |               |  |  |

### Supplemental Table 2 - Illness Severity Concordance

| Groupings                                          | Concordance |       |
|----------------------------------------------------|-------------|-------|
|                                                    | n           | %     |
| Vasopressors + RRT Status                          | 1324        | 78.6% |
| Mechanical Ventilation + RRT Status                | 1401        | 83.2% |
| Vasopressors + Mechanical Ventilation              | 1579        | 93.7% |
| Vasopressors + Mechanical Ventilation + RRT Status | 1310        | 77.7% |

### Supplemental Table 3 - Missing Laboratory Values

| Other Laboratory Findings      | Total |      | Not Hypermagnesemic |       | Hypermagnesemic <sup>a</sup> |       |
|--------------------------------|-------|------|---------------------|-------|------------------------------|-------|
|                                | n     | %    | n                   | %     | n                            | %     |
|                                | 1685  | 1685 | 1330                | 78.9% | 355                          | 21.1% |
| Calcium                        | 0     | 0%   | 0                   | 0%    | 0                            | 0%    |
| Phosphorus                     | 182   | 11%  | 138                 | 10%   | 44                           | 12%   |
| Potassium                      | 0     | 0%   | 0                   | 0%    | 0                            | 0%    |
| Lactate dehydrogenase          | 97    | 6%   | 94                  | 7%    | 3                            | 1%    |
| Haptoglobin                    | 1446  | 86%  | 1141                | 86%   | 205                          | 58%   |
| Creatine phosphokinase         | 271   | 16%  | 225                 | 17%   | 46                           | 13%   |
| Erythrocyte sedimentation rate | 174   | 10%  | 138                 | 10%   | 36                           | 10%   |
| Alkaline phosphatase           | 15    | 1%   | 13                  | 1%    | 2                            | 1%    |
| C-reactive protein             | 91    | 5%   | 72                  | 5%    | 19                           | 5%    |
| Interleukin-6                  | 1672  | 99%  | 1324                | 100%  | 348                          | 98%   |

**Supplemental Table 4 – Sensitivity analysis of the Logistic regression analysis of characteristics and outcomes associated with developing hypermagnesemia excluding patients with hypomagnesemia (red depicts changes from original model)**

|                                       | Original Multivariable<br>(n=1371) |               |        | Multivariable excluding any HypoMg<br>(n=1237) |               |        | Multivariable excluding median Mg <1.7<br>(n=1357) |               |        |
|---------------------------------------|------------------------------------|---------------|--------|------------------------------------------------|---------------|--------|----------------------------------------------------|---------------|--------|
|                                       | OR                                 | CI            | p      | OR                                             | CI            | p      | OR                                                 | CI            | p      |
| <b>Demographics</b>                   |                                    |               |        |                                                |               |        |                                                    |               |        |
| Age (per 10 years)                    | 1.17                               | (1.06 - 1.29) | <0.01  | 1.17                                           | (1.06 - 1.29) | <0.001 | 1.17                                               | (1.06 - 1.29) | <0.01  |
| Sex (reference: female)               | 2.11                               | (1.56 - 2.87) | <0.001 | 1.98                                           | (1.45 - 2.71) | <0.001 | 2.12                                               | (1.56 - 2.87) | <0.001 |
| Race (reference: White <sup>a</sup> ) | 1.32                               | (0.95 - 1.85) | 0.10   | 1.42                                           | (1.00 - 2.00) | <0.05  | 1.32                                               | (0.94 - 1.84) | 0.11   |
| <b>PMHx</b>                           |                                    |               |        |                                                |               |        |                                                    |               |        |
| HTN                                   | 0.71                               | (0.51 - 0.98) | <0.05  | 0.71                                           | (0.51 - 0.99) | <0.05  | 0.70                                               | (0.51 - 0.97) | <0.05  |
| DM                                    | 0.73                               | (0.53 - 0.99) | <0.05  | 0.73                                           | (0.53 - 1.00) | 0.053  | 0.74                                               | (0.54 - 1)    | 0.052  |
| ESRD                                  | 1.64                               | (0.87 - 3.1)  | 0.13   | 1.48                                           | (0.78 - 2.81) | 0.23   | 1.61                                               | (0.85 - 3.05) | 0.14   |
| <b>Illness Severity</b>               |                                    |               |        |                                                |               |        |                                                    |               |        |
| Pressors                              |                                    |               |        |                                                |               |        |                                                    |               |        |
| Mechanical Ventilation                |                                    |               |        |                                                |               |        |                                                    |               |        |
| AKI requiring RRT                     | 3.08                               | (1.97 - 4.81) | <0.001 | 3.36                                           | (2.06 - 5.45) | <0.001 | 3.04                                               | (1.94 - 4.74) | <0.001 |
| <b>Labs</b>                           |                                    |               |        |                                                |               |        |                                                    |               |        |
| any hypercalcemia, <sup>b</sup> mg/dL | 0.88                               | (0.59 - 1.31) | 0.52   | 0.88                                           | (0.58 - 1.33) | 0.54   | 0.90                                               | (0.6 - 1.33)  | 0.59   |
| any hyperkalemia, <sup>c</sup> mmol/L | 1.59                               | (1.17 - 2.16) | <0.05  | 1.72                                           | (1.26 - 2.36) | 0.001  | 1.60                                               | (1.18 - 2.17) | <0.01  |
| Creatine phosphokinase (per 1000 U/L) | 1.03                               | (1 - 1.06)    | <0.05  | 1.03                                           | (1.00 - 1.05) | 0.06   | 1.03                                               | (1 - 1.06)    | <0.05  |
| Lactate dehydrogenase (per 100 U/L)   | 1.03                               | (1 - 1.06)    | 0.08   | 1.03                                           | (0.99 - 1.06) | 0.11   | 1.03                                               | (1 - 1.06)    | 0.08   |
| Alkaline Phosphatase (per 10 U/L)     | 1.00                               | (0.99 - 1.01) | 0.43   | 1.00                                           | (0.99 - 1.01) | 0.57   | 1.00                                               | (0.98 - 1.01) | 0.39   |
| C-reactive protein (per 10 mg/L)      | 1.01                               | (0.99 - 1.02) | 0.39   | 1.01                                           | (0.99 - 1.02) | 0.49   | 1.01                                               | (0.99 - 1.02) | 0.40   |

<sup>a</sup> reference group White Non-Hispanic/Latino and White Hispanic/Latino

<sup>b</sup> hypercalcemia defined as corrected calcium >ULN (10.3 mg/dL)

<sup>c</sup> hyperkalemia defined as potassium >ULN (5.1 mmol/L)

**Supplemental Table 5 – Sensitivity analysis of the survival analysis showing hazard ratios for death excluding patients with hypomagnesemia (red depicts changes from original model)**

|                                       | Original Multivariable<br>(n=1594) |               |        | Multivariable excluding any HypoMg<br>(n=1443) |               |        | Multivariable excluding median Mg <1.7<br>(n=1569) |               |        |
|---------------------------------------|------------------------------------|---------------|--------|------------------------------------------------|---------------|--------|----------------------------------------------------|---------------|--------|
|                                       | HR                                 | CI            | p      | HR                                             | CI            | p      | HR                                                 | CI            | p      |
| <b>Demographics</b>                   |                                    |               |        |                                                |               |        |                                                    |               |        |
| Age (per 10 years)                    | 1.86                               | (1.68 - 2.06) | <0.001 | 1.88                                           | (1.69 - 2.09) | <0.001 | 1.86                                               | (1.68 - 2.06) | <0.001 |
| Sex (reference: female)               | 1.24                               | (0.99 - 1.55) | 0.06   | 1.16                                           | (0.91 - 1.47) | 0.22   | 1.23                                               | (0.99 - 1.54) | 0.07   |
| Race (reference: White <sup>a</sup> ) | 1.01                               | (0.80 - 1.28) | 0.92   | 1.03                                           | (0.81 - 1.33) | 0.79   | 1.00                                               | (0.79 - 1.27) | 0.99   |
| <b>PMHx</b>                           |                                    |               |        |                                                |               |        |                                                    |               |        |
| HTN                                   | 1.07                               | (0.83 - 1.38) | 0.60   | 0.92                                           | (0.7 - 1.21)  | 0.55   | 1.08                                               | (0.84 - 1.4)  | 0.56   |
| DM                                    | 1.22                               | (0.97 - 1.52) | 0.08   | 1.35                                           | (1.06 - 1.71) | <0.05  | 1.22                                               | (0.98 - 1.53) | 0.08   |
| ESRD                                  | 1.36                               | (0.78 - 2.40) | 0.28   | 1.31                                           | (0.74 - 2.31) | 0.36   | 1.35                                               | (0.77 - 2.38) | 0.29   |
| <b>Illness Severity</b>               |                                    |               |        |                                                |               |        |                                                    |               |        |
| Pressors                              | 1.98                               | (1.53 - 2.55) | <0.001 | 2.25                                           | (1.73 - 2.94) | <0.001 | 1.98                                               | (1.53 - 2.55) | <0.001 |
| Mechanical Ventilation                |                                    |               |        |                                                |               |        |                                                    |               |        |
| AKI requiring RRT                     |                                    |               |        |                                                |               |        |                                                    |               |        |
| <b>Labs</b>                           |                                    |               |        |                                                |               |        |                                                    |               |        |
| C-reactive protein (per 10 mg/L)      | 1.01                               | (1.00 - 1.03) | <0.05  | 1.01                                           | (1 - 1.03)    | <0.05  | 1.01                                               | (1 - 1.03)    | <0.05  |
| hypermagnesemia <sup>b</sup>          | 2.03                               | (1.63 - 2.54) | <0.001 | 1.87                                           | (1.49 - 2.34) | <0.001 | 2.03                                               | (1.63 - 2.53) | <0.001 |

<sup>a</sup> reference group White Non-Hispanic/Latino and White Hispanic/Latino

<sup>b</sup> defined as median [Mg] > upper limit of normal (2.4 mmol/L)

**Supplemental Figure 1 - Patient survival curves by median magnesium tertiles**

Kaplan Meier curve for patient survival over time from admission for all patients stratified by tertiles of median magnesium (lowest values = Tertile 1 (blue) while highest values = Tertile 3 (green);  $p < 0.001$ ).

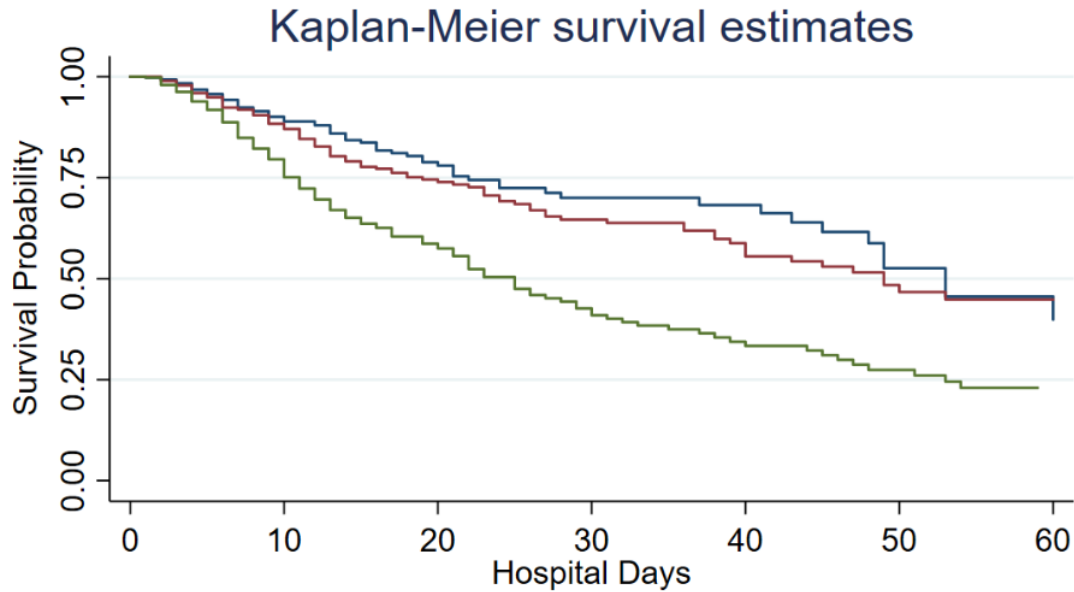

Number at risk

|               |     |     |     |    |    |    |    |
|---------------|-----|-----|-----|----|----|----|----|
| MgTertile = 1 | 568 | 231 | 93  | 53 | 34 | 16 | 8  |
| MgTertile = 2 | 576 | 272 | 120 | 81 | 54 | 28 | 12 |
| MgTertile = 3 | 541 | 250 | 98  | 50 | 33 | 20 | 13 |

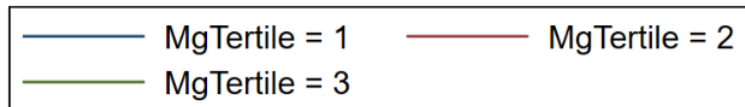

Supplement: 7431_2_supp_77330_qt6f7s.pdf [file 7431_2_supp_77330_qt6f7s.pdf]
